# Supplementary material for: ID1 expressing macrophages support cancer cell stemness and limit CD8+ T cell infiltration in colorectal cancer
Source: Springer Nature journal article supplement (doi:10.1038/s41467-023-43548-w), 2023-11-23
Supplement: MOESM1 [file 41467_2023_43548_MOESM1_ESM.pdf]

1 **ID1 Expressing Macrophages Support Cancer Cell Stemness and Limit CD8<sup>+</sup> T Cell Infiltration**  
2 **in Colorectal Cancer**

3  
4 Shuang Shang et. al

5 **Supplementary-figures and legends**

6  
7 **Supplementary-tables**

8 **Supplementary-figures and legends**

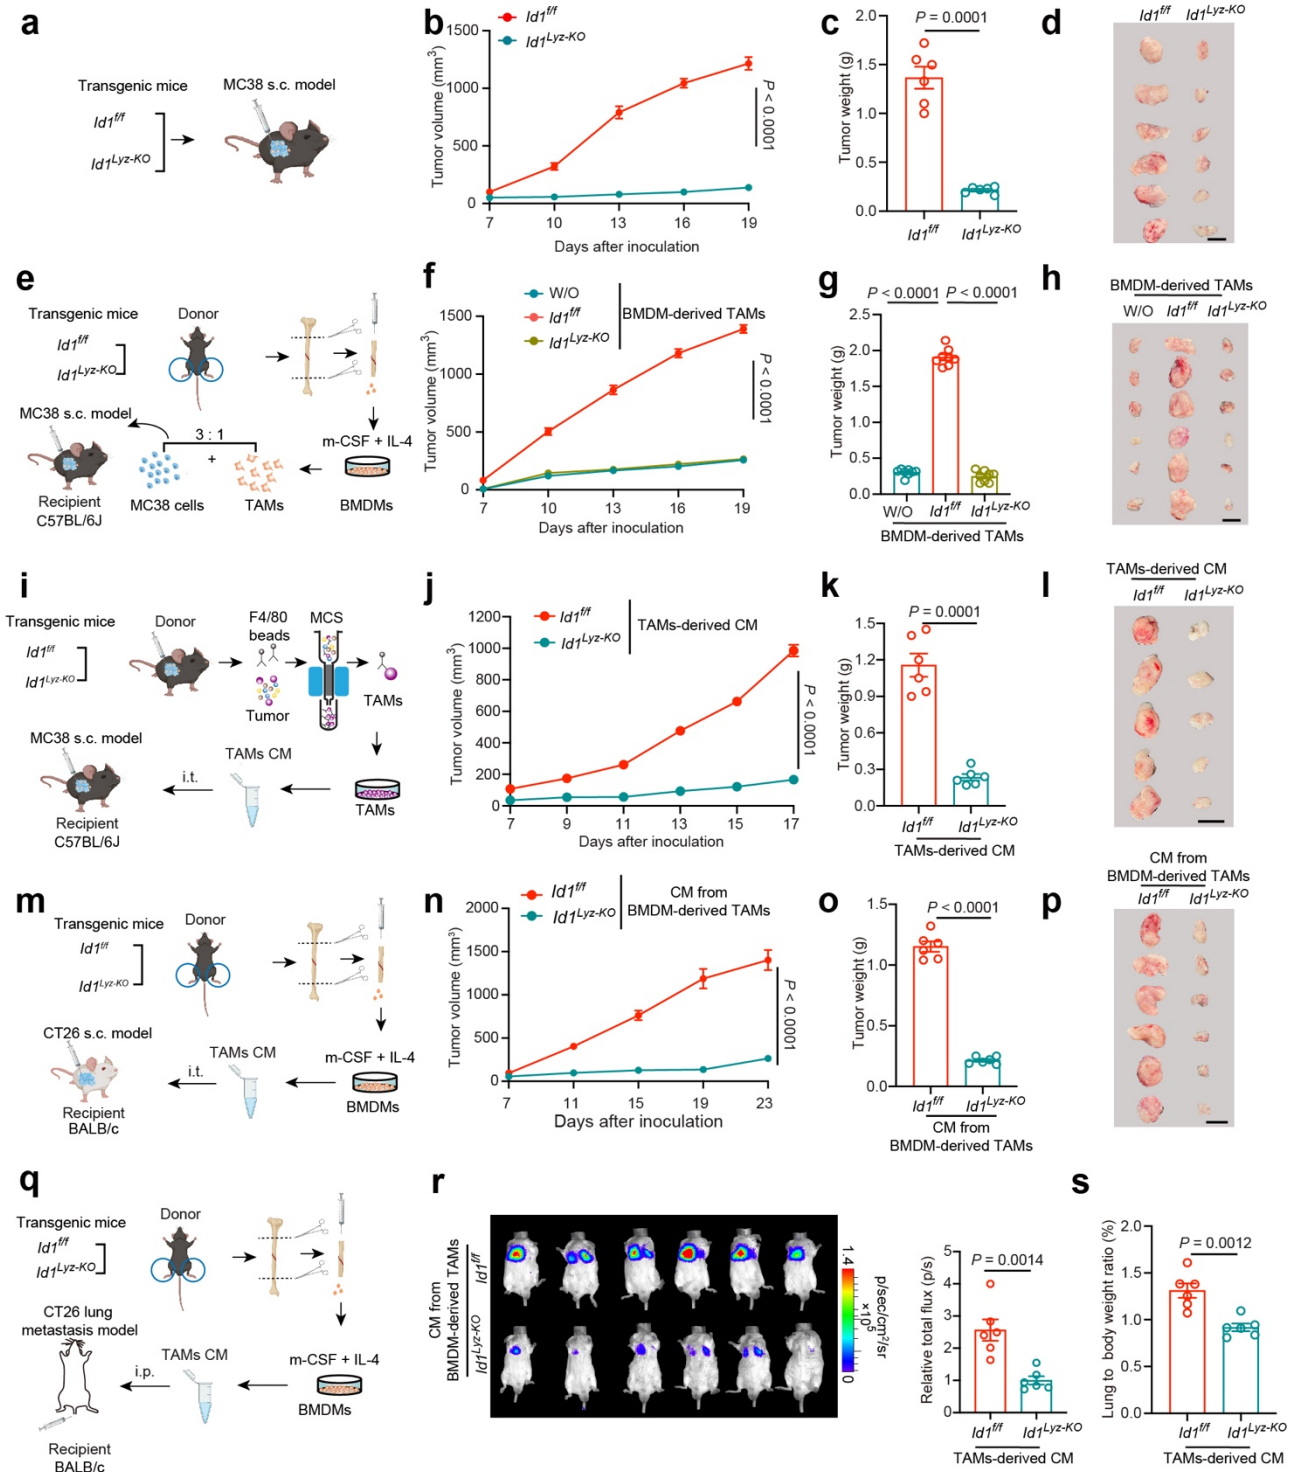

9  
10 **Supplementary Fig. 1 Depletion of *Id1* in TAMs inhibits CRC tumor growth.**

11 **a**, Schematic diagram for establishing the MC38 s.c. model in  $Id1^{fl/fl}$  and  $Id1^{Lyz-KO}$  mice. **b-d**, Tumor volumes (**b**),  
12 tumor weight (**c**) and representative tumor images (**d**) as presented in (**a**),  $n = 6$  mice per group, Welch's test. Scale  
13 bar, 1 cm. **e**, Schematic diagram for adoptive transfer of BMDM-derived TAMs to C57BL/6J mice for establishing

14 the MC38 and TAMs mixture s.c. model. W/O: without. **f-h**, Tumor volumes (**f**), tumor weight (**g**) and representative  
15 tumor images (**h**) of the indicated groups as presented in (**e**),  $n = 8$  mice per group, one-way ANOVA test. Scale bar,  
16 1 cm. **i**, Schematic diagram for establishing the MC38 s.c. model with intratumoral (i.t.) injection of CM from  
17 indicated TAMs. **j-l**, Tumor volumes (**j**), tumor weight (**k**) and representative tumor images (**l**) of the indicated  
18 groups as presented in (**i**),  $n = 6$  mice per group, Welch's test. Scale bar, 1 cm. **m**, Schematic diagram for establishing  
19 the CT26 s.c. model with i.t. injection of CM from BMDM-derived TAMs. **n-p**, Tumor volumes (**n**), tumor weight  
20 (**o**) and representative tumor images (**p**) of the indicated groups as presented in (**m**),  $n = 6$  mice per group, Welch's  
21 test. Scale bar, 1 cm. **q**, Schematic diagram for establishing the CT26 lung metastasis model in BALB/c mice with  
22 i.p. injection of CM from BMDM-derived TAMs. **r**, Representative bioluminescence images and the statistical data  
23 of indicated groups as presented in (**q**),  $n = 6$  mice per group, Student's  $t$  test. **s**, Statistical data of lung weight/body  
24 weight ratio of indicated groups as presented in (**q**),  $n = 6$  mice per group, Student's  $t$  test. Elements of **a**, **e**, **i**, **m**  
25 and **q** are created with BioRender.com. Source data are provided as a Source Data file.

26

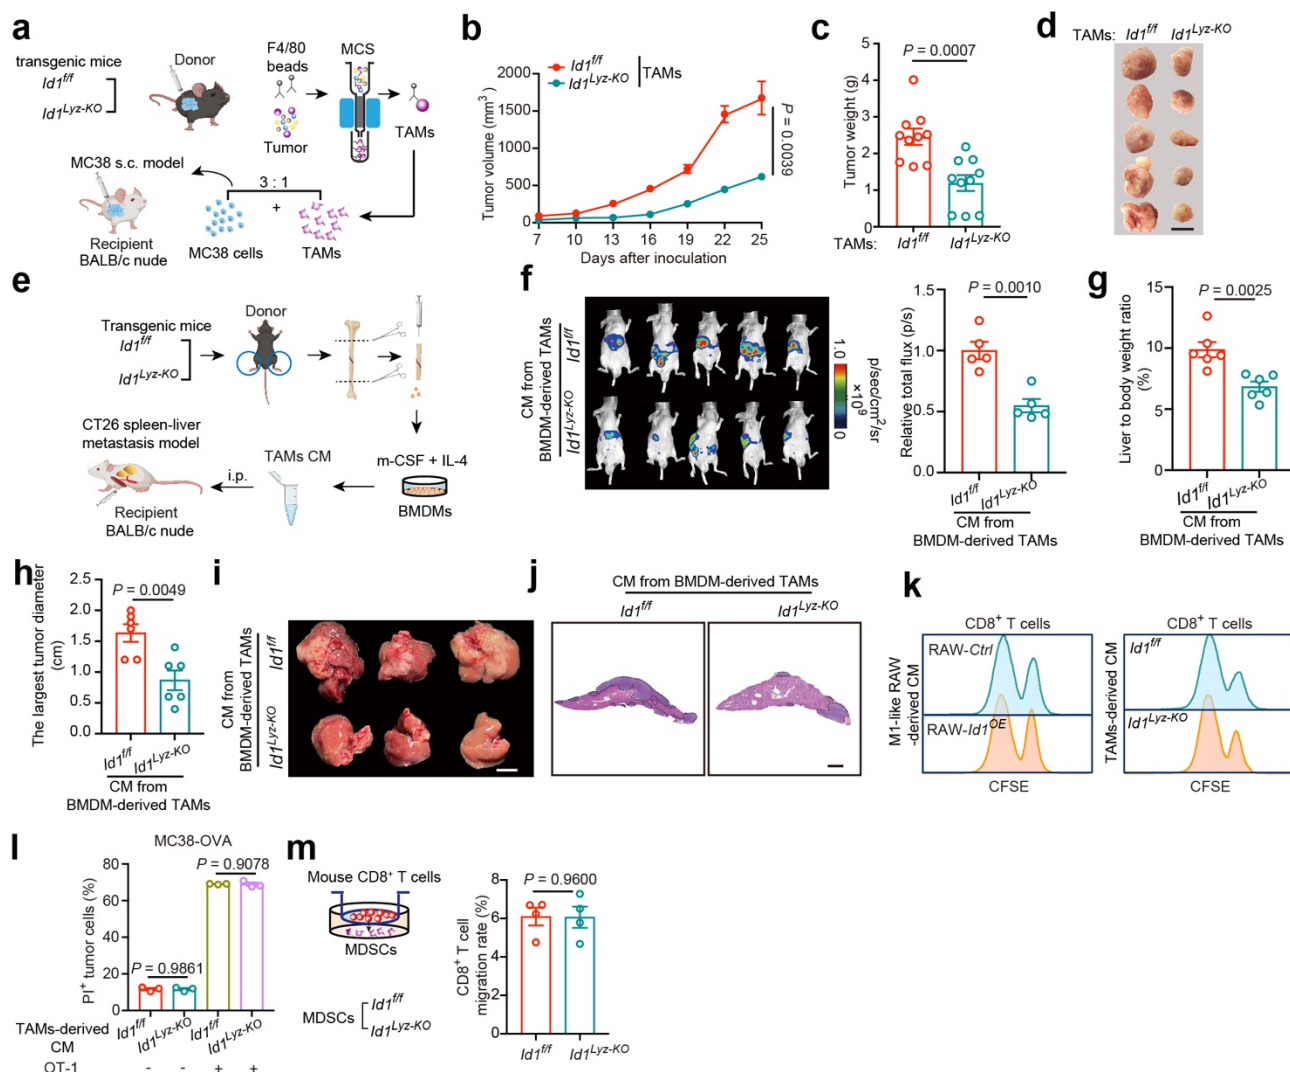

**Supplementary Fig. 2 ID1 expressing TAMs promote CRC tumor growth and liver metastasis in immunodeficient mice.**

**a**, Schematic diagram for adoptive transfer of TAMs to BALB/c nude mice for establishing the MC38 s.c. model. **b-d**, Tumor volumes (**b**), tumor weight (**c**) and representative tumor images (**d**) of indicated groups as presented in (**a**),  $n = 10$  mice per group, Student's  $t$  test. Scale bar, 1 cm. **e**, Schematic diagram for establishing the CT26 spleen-liver metastasis model in BALB/c nude mice with i.p. injection of CM from BMDM-derived TAMs. **f**, Representative bioluminescence images and statistical data of bioluminescence signal of indicated groups as presented in (**e**),  $n = 5$  mice per group, Student's  $t$  test. **g**, Ratio of liver weight to body weight of indicated groups in (**e**),  $n = 6$  mice per group, Student's  $t$  test. **h**, The largest diameter of metastatic tumor of the indicated groups presented in (**e**),  $n = 6$  mice per group, Student's  $t$  test. **i, j**, Representative gross liver images (**i**) and H&E staining of the liver (**j**) for the indicated groups in (**e**). Scale bar, 1 cm (**i**), 2 mm (**j**). **k**, Representative flow cytometry plots of CFSE-labeled  $CD8^+$  T cells treated with CM from M1-like *Ctrl* or *Id1<sup>OE</sup>* RAW 264.7 cells (left), or with CM

40 from TAMs isolated from MC38-derived tumor nodules inoculated in *Id1<sup>ff</sup>* or *Id1<sup>Lyz-KO</sup>* mice, n = 3 biologically  
41 independent samples. **l**, Effects of *Id1* depletion in TAMs on OT-1 T cells mediated tumor killing. Results are shown  
42 as the percentages of PI<sup>+</sup> tumor cells, n = 3 biologically independent samples, Student's *t* test. **m**, Relative migration  
43 rate of CD8<sup>+</sup> T cells cocultured with *Ctrl* or *Id1<sup>KD</sup>* MDSCs. n = 4 biologically independent samples, Student's *t* test.  
44 Elements of **a** and **e** are created with BioRender.com. Source data are provided as a Source Data file.

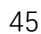

47

49

50

groups of THP-1 cells (**c**),  $n = 3$  (**b**) or 4 (**c**) biologically independent samples, Student's  $t$  test. **d-f**, Images and quantification of MC38 (**d**), CT26 (**e**), or HCT116 (**f**) tumor spheres treated with CM from different groups of BMDMs-derived TAMs (**d**), RAW 264.7 cells (**e**) or THP-1 cells (**f**),  $n = 3$  biologically independent samples, Student's  $t$  test. **g, h**, Tumor invasiveness of CT26 cells (**g**) or DLD-1 cells (**h**) pre-cultured with CM from different groups of RAW 264.7 cells (**g**) or THP-1 cells (**h**),  $n = 3$  biologically independent samples, Student's  $t$  test. Scale bar, 100  $\mu\text{m}$ . **i**, GSEA analysis on differentially expressed genes between CD45<sup>-</sup>Epcam<sup>+</sup> tumor cells of groups presented in Fig.4g with a predefined gene set of Notch, Wnt and SHH signaling.  $n = 3$  biologically independent samples per group in the RNA-seq data. **j-l**, Immunoblots of indicated proteins in CD45<sup>-</sup>Epcam<sup>+</sup> tumor cells isolated from tumors nodules as presented in Fig. 2a (**j**), 2e (**k**) and 2p (**l**),  $n = 3$  biologically independent samples. **m**, Immunoblots of indicated proteins in MC38 cells cocultured with TAMs isolated from MC38 derived tumors inoculated in *Id1<sup>ff</sup>* or *Id1<sup>Lyz-KO</sup>* mice,  $n = 3$  biologically independent samples. **n**, Immunoblots of indicated proteins in HCT116 cells cocultured with different groups of THP-1 cells in addition of MG132,  $n = 3$  biologically independent samples. **o**, Immunoblots of cytosolic and nuclear YAP in HCT116 cells cocultured with different groups of THP-1 cells,  $n = 3$  biologically independent samples. **p**, Relative luciferase activity of TEAD in HCT116 cells cocultured with different groups of THP-1 cells,  $n = 3$  biologically independent samples, Student's  $t$  test. **q**, Relative mRNA expression of YAP downstream genes in HCT116 cells treated with different groups of THP-1 cells,  $n = 3$  biologically independent samples, Student's  $t$  test. **r**, Effects of Y15 on the invasiveness of CT26 cells pre-treated with CM from M1-like *Ctrl* or *Id1<sup>OE</sup>* RAW 264.7 cells,  $n = 3$ , Brown-Forsythe ANOVA test. Scale bar, 100  $\mu\text{m}$ . **s**, Effects of Y15 on tumor sphere formation ability of HCT116 cells treated with CM from M1-like *Ctrl* or *Id1<sup>OE</sup>* THP-1 cells,  $n = 3$ , Student's  $t$  test. Source data are provided as a Source Data file.



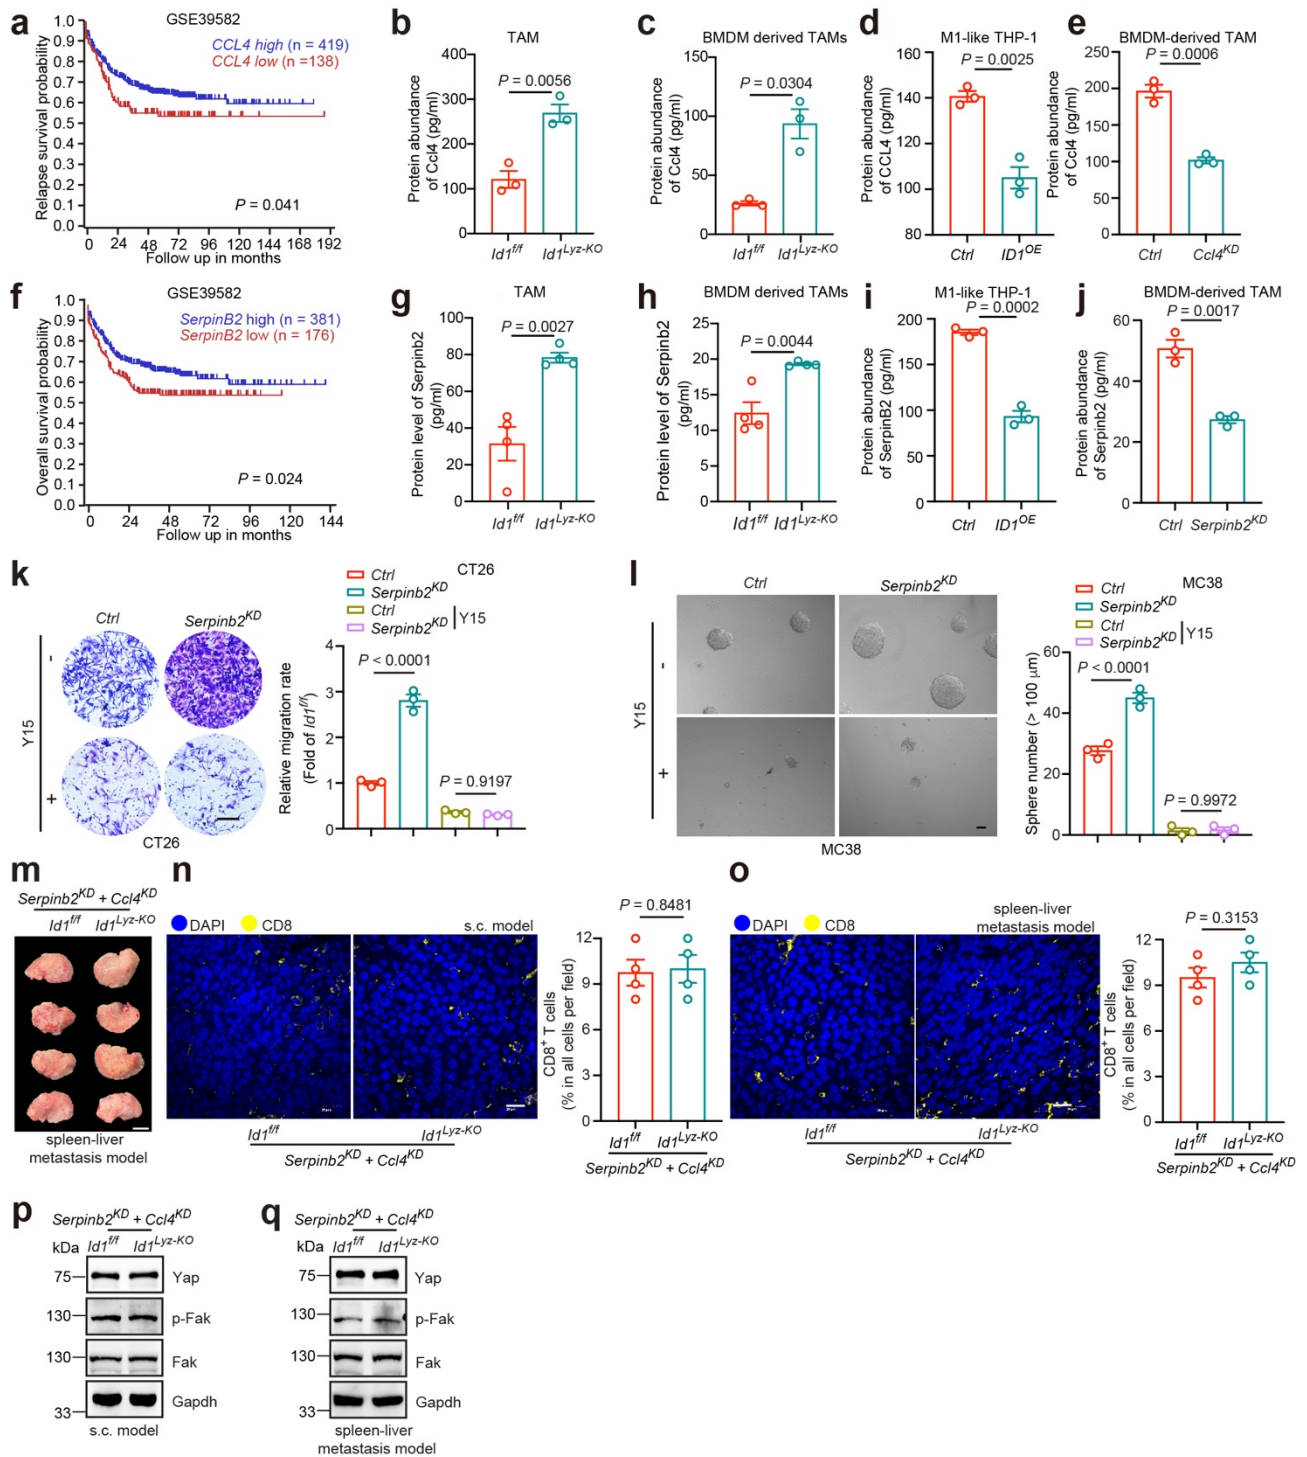

72

73 **Supplementary Fig. 4 ID1 inhibits *CCL4* and *SerpinB2* transcription in TAMs to promote CRC development.**

74 **a**, Kaplan-Meier survival plot stratified by *CCL4* expression of CRC patients ([https://hgserver1.amc.nl/cgi-](https://hgserver1.amc.nl/cgi-bin/r2/main.cgi)

75 [bin/r2/main.cgi](https://hgserver1.amc.nl/cgi-bin/r2/main.cgi)). **b**, Ccl4 abundance in the CM from *Id1<sup>fl/fl</sup>* and *Id1<sup>lyz-KO</sup>* TAMs, n = 3 biologically independent

76 samples, Welch's test. **c**, Ccl4 abundance in the CM from BMDM-derived *Id1<sup>fl/fl</sup>* or *Id1<sup>lyz-KO</sup>* TAMs, n = 3 biologically

77 independent samples, Welch's test. **d**, CCL4 abundance in M1-like *Ctrl* or *ID1<sup>OE</sup>* THP-1 cells, n = 3 biologically

78 independent samples, Student's *t* test. **e**, Ccl4 abundance in the CM from BMDM-derived TAMs infected with



79 lentivirus expressing *Ccl4*-specific shRNA, n = 3 biologically independent samples, Student's *t* test. **f**, Kaplan-Meier  
80 survival plot stratified by *SerpinB2* expression of CRC patients (<https://hgserver1.amc.nl/cgi-bin/r2/main.cgi>). **g**,  
81 Serpinb2 abundance in the CM from *Id1<sup>ff</sup>* and *Id1<sup>Ly2-KO</sup>* TAMs, n = 4 biologically independent samples, Student's *t*  
82 test. **h**, Serpinb2 abundance in BMDM-derived *Id1<sup>ff</sup>* or *Id1<sup>Ly2-KO</sup>* TAMs, n = 4 biologically independent samples,  
83 Welch's test. **i**, SerpinB2 abundance in M1-like *Ctrl* or *ID1<sup>OE</sup>* THP-1 cells, n = 3 biologically independent samples,  
84 Student's *t* test. **j**, Serpinb2 abundance in the CM from BMDM-derived TAMs infected with lentivirus expressing  
85 *Serpinb2*-specific shRNA, n = 3 biologically independent samples, Student's *t* test. **k**, Y15 on CT26 invasiveness  
86 pretreated with CM from *Ctrl* or *Serpinb2<sup>KD</sup>* BMDM-derived TAMs. n = 3 biologically independent samples, one-  
87 way ANOVA test. Scale bar, 100  $\mu$ m. **l**, Y15 on tumor sphere forming ability of MC38 cells treated with CM from  
88 *Ctrl* or *Serpinb2<sup>KD</sup>* BMDM-derived TAMs. n = 3 biologically independent samples, one-way ANOVA test. Scale  
89 bar, 100  $\mu$ m. **m**, Representative gross images of liver in the indicated groups as presented in Fig. 5p. Scale bar, 1  
90 cm. **n**, **o**, Representative mIHC images and statistical data of CD8<sup>+</sup> T cells infiltrated in the tumor tissues of s.c.  
91 model as presented in Fig. 5n (**n**) and spleen-liver metastasis model (**o**) as presented in Fig. 5p, n = 4 biologically  
92 independent samples, Student's *t* test. **p**, **q**, Immunoblots of Yap, p-Fak and Fak in CD45<sup>-</sup> EpCAM<sup>+</sup> tumor cells  
93 isolated from the indicated groups of tumor tissues in the s.c. model as presented in Fig. 5n (**p**) or in the spleen-liver  
94 metastasis model as presented in Fig. 5p (**q**), n = 3 biologically independent samples. Source data are provided as a  
95 Source Data file.

96

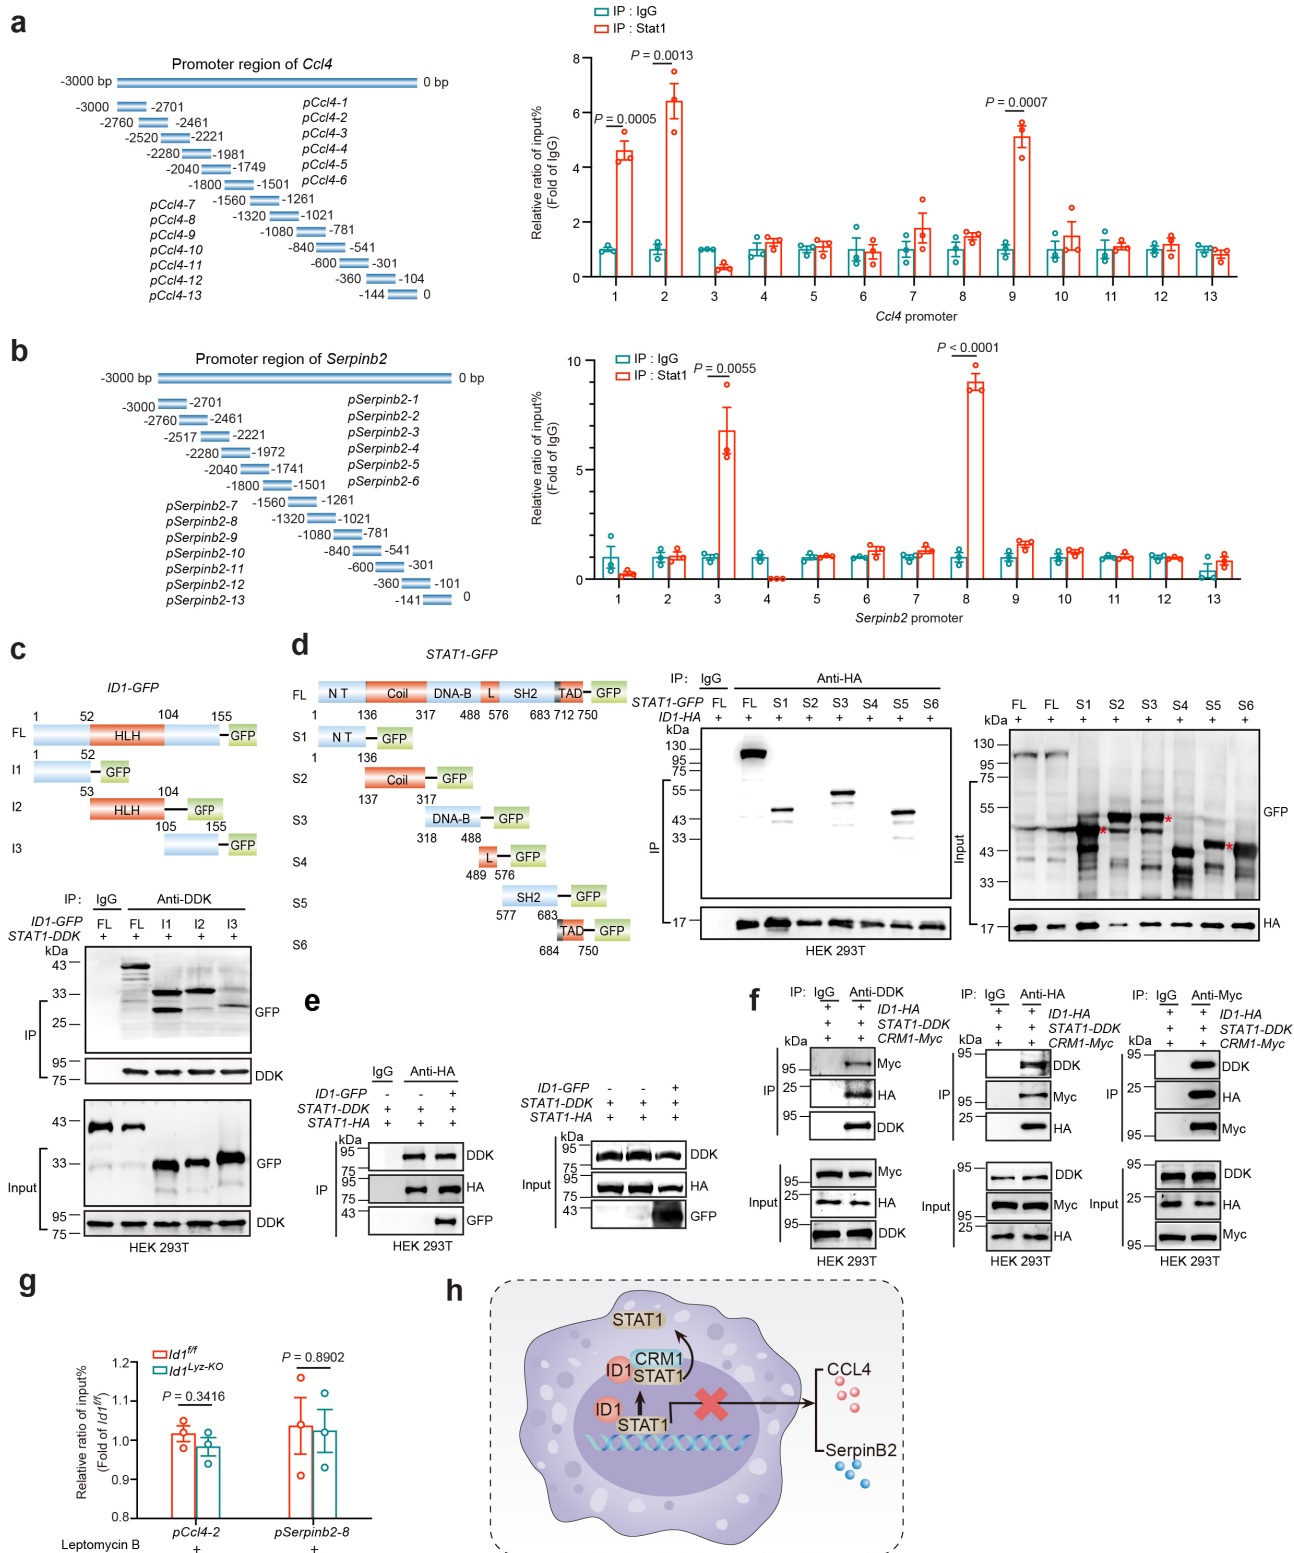

**Supplementary Fig. 5 ID1 interacts with STAT1 to promote the formation of ID1-STAT1-CRM1 heterotrimeric complex and inhibit STAT1-mediated *CCL4* and *SerpinB2* transcription.**

**a, b**, Identification of the Stat1 binding region on *Ccl4* (a) and *Serpinb2* (b) promoter. RAW264.7 cells were subjected to chromatin immunoprecipitation (ChIP) using antibodies against Stat1. IgG isotype antibody was used

102 as control, n = 3 biologically independent samples, Student's *t* test. **c**, Mapping ID1 regions involved in STAT1  
103 binding. Up: Schematic diagram of GFP-tagged *ID1* deletion mutants. Down: Cell extracts from HEK 293T cells  
104 transfected with indicated constructs were immunoprecipitated with anti-DDK antibody and blotted with anti-GFP  
105 antibody. IgG isotype antibody was used as control. **d**, Mapping STAT1 regions involved in ID1 binding. Left:  
106 Schematic diagram of GFP-tagged *STAT1* deletion mutants. Right: Cell extracts from HEK 293T cells transfected  
107 with indicated constructs were immunoprecipitated with anti-HA antibody and blotted with anti-GFP antibody. IgG  
108 isotype antibody was used as control, n = 3 biologically independent samples. **e**, Co-immunoprecipitation to detect  
109 the effect of ID1 on the homodimerization of STAT1, n = 3 biologically independent samples. **f**, Cell extracts from  
110 HEK 293T cells co-transfected with indicated expressing plasmids were immunoprecipitated with anti-DDK, anti-  
111 HA or anti-Myc antibodies respectively. IgG isotype antibody was used as control, n = 3 biologically independent  
112 samples. **g**, *Id1<sup>fl/fl</sup>* and *Id1<sup>Lyz-KO</sup>* TAMs under the treatment of leptomycin B (100 nM) for 6 hours were subjected to  
113 ChIP using antibodies against Stat1. Data are presented as the proportion of chromatin input (input%), n = 3  
114 biologically independent samples, Student's *t* test. **h**, Cartoon showing the proposed molecular mechanism of ID1  
115 in the inhibition of *CCL4* and *SerpinB2* transcription. ID1 recruits CRM1 to STAT1 to form a heterotrimeric protein  
116 complex, which promotes STAT1 cytoplasmic distribution and inhibits the transcription of *CCL4* and *SerpinB2*.  
117 *Elements adapted from Tsilimigras DI, et al. Liver metastases. Nat Rev Dis Primers. 7:27, 2021; are reproduced*  
118 *with permission from Springer Nature (<https://www.nature.com/nrmp/>)<sup>56</sup>. Source data are provided as a Source Data*  
119 *file.*

120

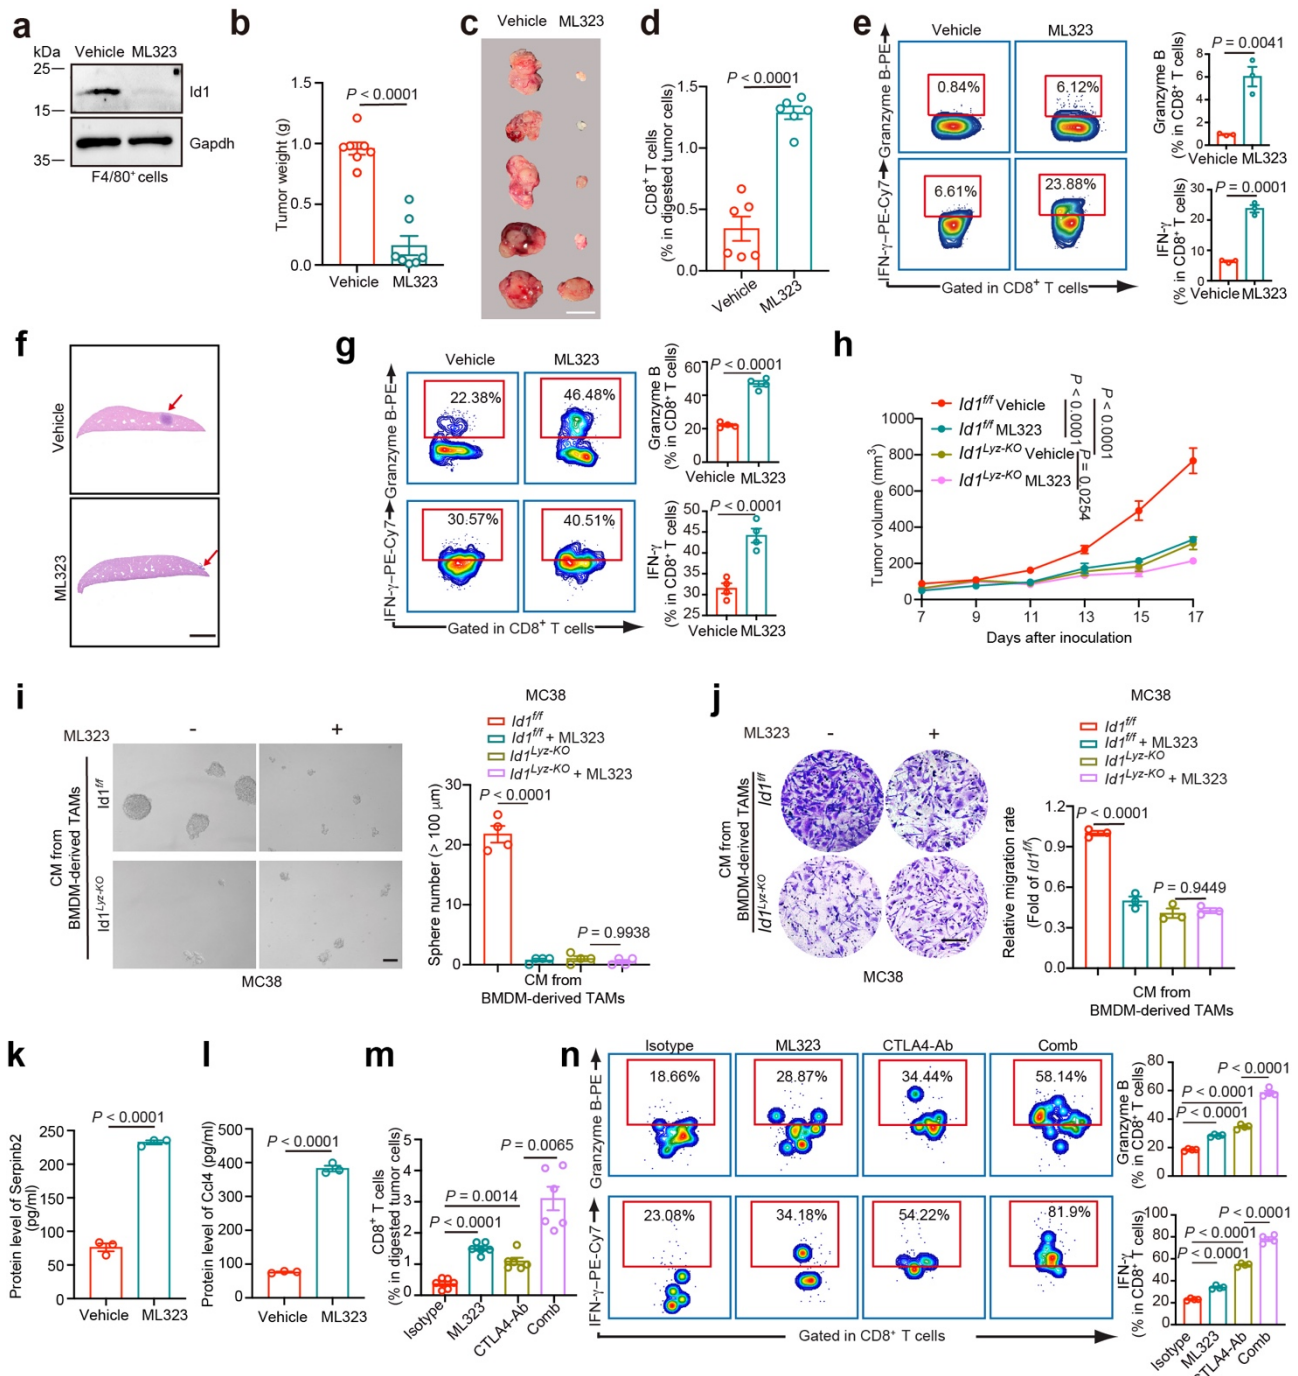

**Supplementary Fig. 6 Targeting ID1 in TAMs Inhibits CRC Progression and Sensitizes Tumor Cells to Immunotherapy.**

**a**, Immunoblot of Id1 in F4/80<sup>+</sup> TAMs in the indicated groups as presented in Fig. 7a,  $n = 3$  biologically independent samples. **b, c**, Tumor weight (**b**) and representative tumor nodule images (**c**) of indicated groups as presented in Fig. 7a,  $n = 8$  mice per group, Welch's test. Scale bar, 1 cm. **d**, The percentage of CD8<sup>+</sup> T cells infiltrated in the indicated tumor tissues as presented in Fig. 7a,  $n = 6$  mice per group, Student's  $t$  test. **e**, Representative density dot plots and the statistical data for IFN- $\gamma$ <sup>+</sup> CD8<sup>+</sup> T cells and Granzyme B<sup>+</sup> CD8<sup>+</sup> T cells in the tumor tissues from the indicated

129 groups as presented in Fig. 7a,  $n = 3$  mice per group, Student's  $t$  test. **f**, Representative H&E staining of the liver  
130 from the indicated groups as presented in Fig. 7e. Scale bar, 2 mm. **g**, Representative density dot plots and the  
131 statistical data for IFN- $\gamma^+$  CD8 $^+$  T cells and Granzyme B $^+$  CD8 $^+$  T cells in liver metastases from the indicated groups  
132 as presented in Fig. 7e,  $n = 4$  mice per group, Student's  $t$  test. **h**, Tumor growth of indicated groups presented in Fig.  
133 7j. **i**, ML323 treatment on tumor sphere forming ability of MC38 cells treated with CM from *Id1<sup>ff</sup>* or *Id1<sup>Lyz-KO</sup>*  
134 BMDM-derived TAMs,  $n = 4$  biologically independent samples, one-way ANOVA test. Scale bar, 100  $\mu$ m. **j**, ML323  
135 treatment on tumor invasiveness of MC38 cells pre-treated with CM from *Id1<sup>ff</sup>* or *Id1<sup>Lyz-KO</sup>* BMDM-derived TAMs,  
136  $n = 3$  biologically independent samples, one-way ANOVA test. Scale bar, 100  $\mu$ m. **k, l**, Protein level of Serpinb2  
137 and Ccl4 in the CM of TAMs isolated as presented in Fig. 7l,  $n = 3$  biologically independent samples, Student's  $t$   
138 test. **m**, The percentages of infiltrating CD8 $^+$  T cells in the indicated tumor tissues as presented in Fig. 7w,  $n = 6$   
139 mice per group, Welch's test. **n**, Representative density dot plots and the statistical data for IFN- $\gamma^+$  CD8 $^+$  T cells and  
140 Granzyme B $^+$  CD8 $^+$  T cells in the tumor tissues from the indicated groups as presented in Fig. 7w,  $n = 4$  mice per  
141 group, Welch's test. Source data are provided as a Source Data file.

142

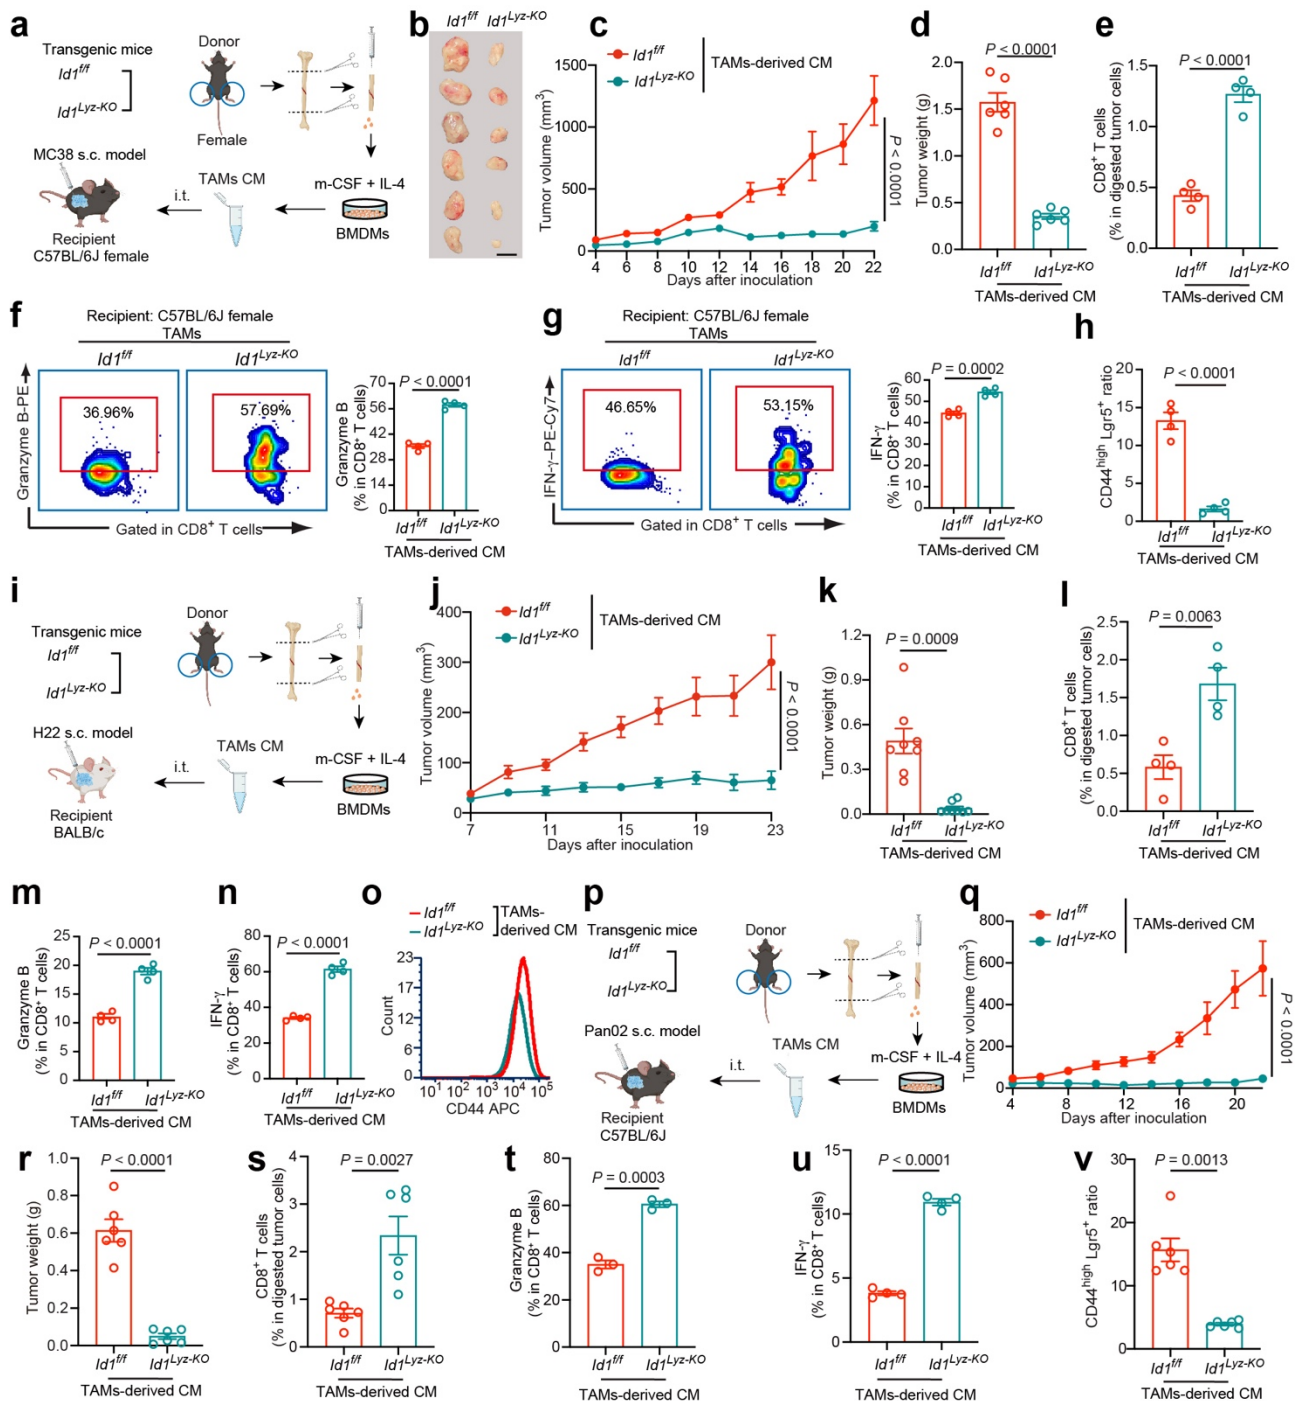

**Supplementary Fig. 7 The generalizability of *Id1* depletion in TAMs in the inhibition of tumor growth.**

**a**, Schematic diagram for establishing the female MC38 s.c. model with i.t. injection of CM from female  $Id1^{fl/fl}$  or  $Id1^{Lyz-KO}$  BMDM-derived TAMs. **b-d**, Representative tumor images (b), tumor volumes (c) and tumor weight (d) of the indicated groups as presented in (a),  $n = 6$  mice per group, Student's  $t$  test. Scale bar, 1 cm. **e**, Percentage of  $CD8^+$  T cells infiltrated in the tumor tissues as presented in (a),  $n = 4$  mice per group, Student's  $t$  test. **f, g**, Representative density dot plots and the statistical data for Granzyme B $^+$   $CD8^+$  T cells and IFN- $\gamma^+$   $CD8^+$  T cells in the tumor tissues from the indicated groups as presented in (a),  $n = 4$  biologically independent samples per group,



151 Student's *t* test. **h**, CD44<sup>high</sup> Lgr5<sup>+</sup> cell ratio in CD45<sup>-</sup> Epcam<sup>+</sup> tumor cells from the indicated groups as presented in  
152 (**a**), *n* = 4 biologically independent samples, Student's *t* test. **i**, Schematic diagram for establishing the H22 s.c.  
153 model with i.t. injection of CM from *Id1*<sup>ff</sup> or *Id1*<sup>lyz-KO</sup> BMDM-derived TAMs. **j**, **k**, Tumor volumes (**j**) and tumor  
154 weight (**k**) of the indicated groups as presented in (**i**), *n* = 8 mice per group, Student's *t* test. Scale bar, 1 cm. **l**,  
155 Percentage of CD8<sup>+</sup> T cells infiltrated in the tumor tissues from recipient mice in (**i**), *n* = 4 mice per group, Student's  
156 *t* test. **m**, **n**, Statistical data for Granzyme B<sup>+</sup> CD8<sup>+</sup> T cells and IFN- $\gamma$ <sup>+</sup> CD8<sup>+</sup> T cells in the tumor tissues from the  
157 indicated groups as presented in (**i**), *n* = 4 biologically independent samples per group, Student's *t* test. **o**, CD44 in  
158 CD45<sup>-</sup> Epcam<sup>+</sup> tumor cells in the indicated groups as presented in (**i**). **p**, Schematic diagram for establishing the  
159 Pan02 s.c. model with i.t. injection of CM from *Id1*<sup>ff</sup> or *Id1*<sup>lyz-KO</sup> BMDM-derived TAMs. **q**, **r**, Tumor volumes (**q**)  
160 and tumor weight (**r**) of the indicated groups as presented in (**p**), *n* = 6 mice per group, Student's *t* test. Scale bar, 1  
161 cm. **s**, Percentage of CD8<sup>+</sup> T cells infiltrated in the tumor tissues as presented in (**p**), *n* = 6 mice per group, Student's  
162 *t* test. **t**, **u**, The percentage of Granzyme B<sup>+</sup> CD8<sup>+</sup> T cells and IFN- $\gamma$ <sup>+</sup> CD8<sup>+</sup> T cells in the tumor tissues from the  
163 indicated groups as presented in (**p**), *n* = 3 (**t**) or 4 (**u**) mice per group, Student's *t* test. **v**, CD44<sup>high</sup> Lgr5<sup>+</sup> cell ratio  
164 in CD45<sup>-</sup> Epcam<sup>+</sup> tumor cells from the indicated groups as presented in (**p**). Elements of **a**, **i** and **p** are created with  
165 BioRender.com. Source data are provided as a Source Data file.

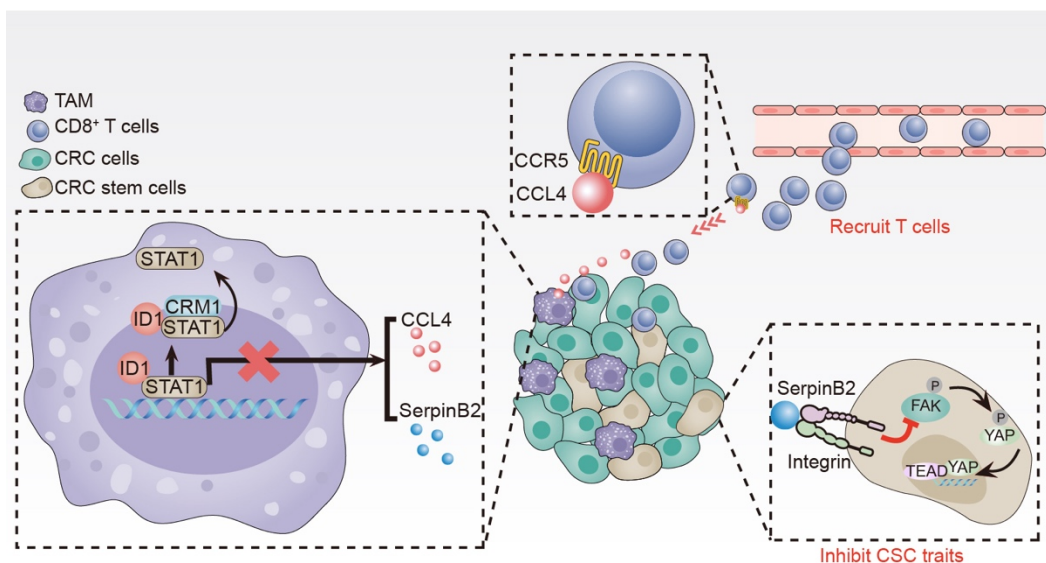

168

169

### Supplementary Fig. 8 Graphical model.

170

171

172

173

174

175

176

ID1 interacts with STAT1 to promote STAT1 cytoplasmic distribution via enhancing its association with CRM1, which reduces STAT1-mediated transcription of *CCL4* and *SerpinB2* in TAMs. The reduced *CCL4* limits CD8<sup>+</sup> T cells recruitment to tumor sites, while the diminished *SerpinB2* enhances CRC stemness traits via expanding FAK-YAP signaling activity. Such two effects synergistically promote CRC growth and metastasis. *Elements adapted from Tsilimigras DI, et al. Liver metastases. Nat Rev Dis Primers. 7:27, 2021; are reproduced with permission from Springer Nature (<https://www.nature.com/nrmp/>)<sup>56</sup>.*

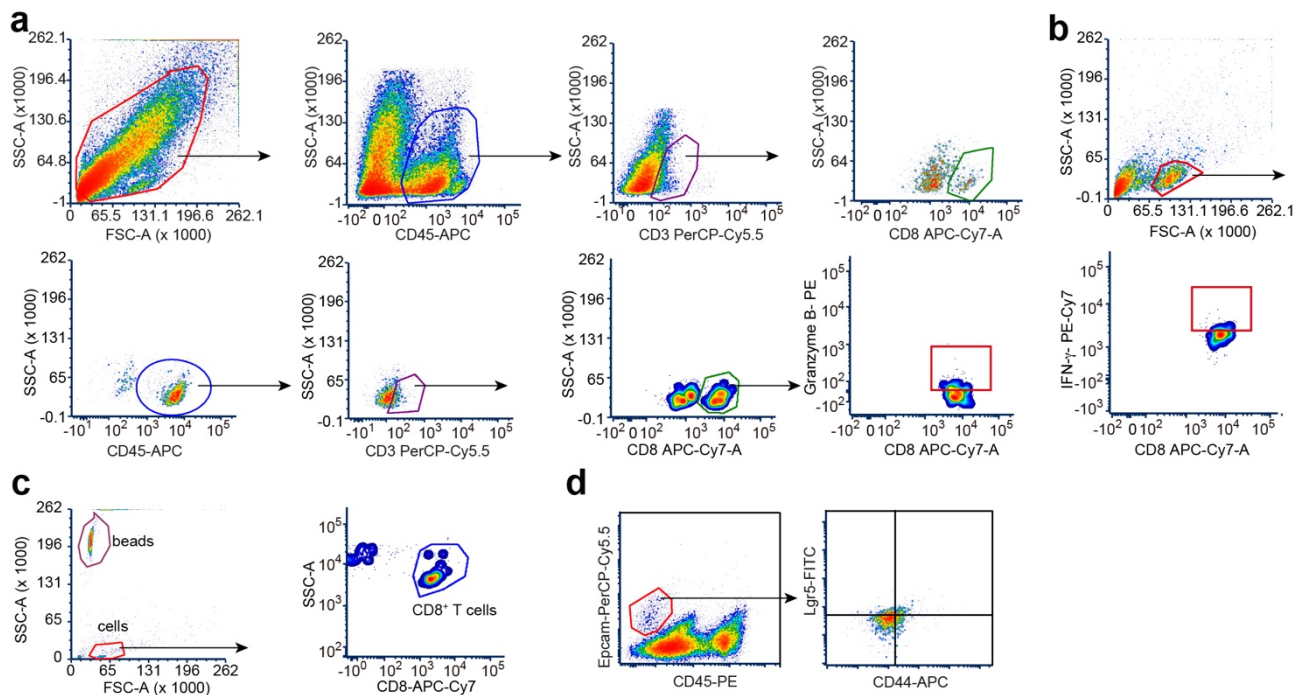

**Supplementary Fig. 9 Flow cytometry gating strategy for all stains.**

**a**, Gating strategy of CD8<sup>+</sup> T cells in tumor tissues (Fig. 3b, 3g and 7h; Supplementary Fig. 6d, 6m, 7e, 7l and 7s). Among all cells, leukocytes were gated as CD45-APC<sup>+</sup>, lymphocytes were gated as CD3-PerCP-Cy5.5<sup>+</sup>, effective T cells were gated as CD8-APC-Cy7<sup>+</sup>. **b**, Gating strategy of CD8<sup>+</sup>/Granzyme B or CD8<sup>+</sup>/IFN- $\gamma$  T cells in tumor cells suspension after ficoll separation. The first gate excludes nonlymphocyte populations based on forward and side scatter (FSC and SSC). Then leukocytes were gated as CD45-APC<sup>+</sup>, lymphocytes were gated as CD3-PerCP-Cy5.5<sup>+</sup>, effective T cells were gated as CD8-APC-Cy7<sup>+</sup>, active CD8<sup>+</sup> T cells were gated by Granzyme B-PE and IFN- $\gamma$ -PE-Cy7 (Fig. 3d; Supplementary Fig. 6e, 6g, 6n, 7f, 7g, 7m, 7n, 7t and 7u). **c**, Gating strategy of CD8<sup>+</sup> T cells migration assay. effective T cells were gated as CD8-APC-Cy7<sup>+</sup> (Fig. 3o, 3p, 3q, 5g, 7m and 7o; Supplementary Fig. 2m). **d**, Gating strategy of tumor cells (Fig. 4a, 4b, 7d and 7i; Supplementary Fig. 3a, 7h, 7o and 7v). Among all cells in tumor tissues, tumor cells were gated by Epcam-PerCP-Cy5.5<sup>+</sup>/CD45<sup>-</sup>.

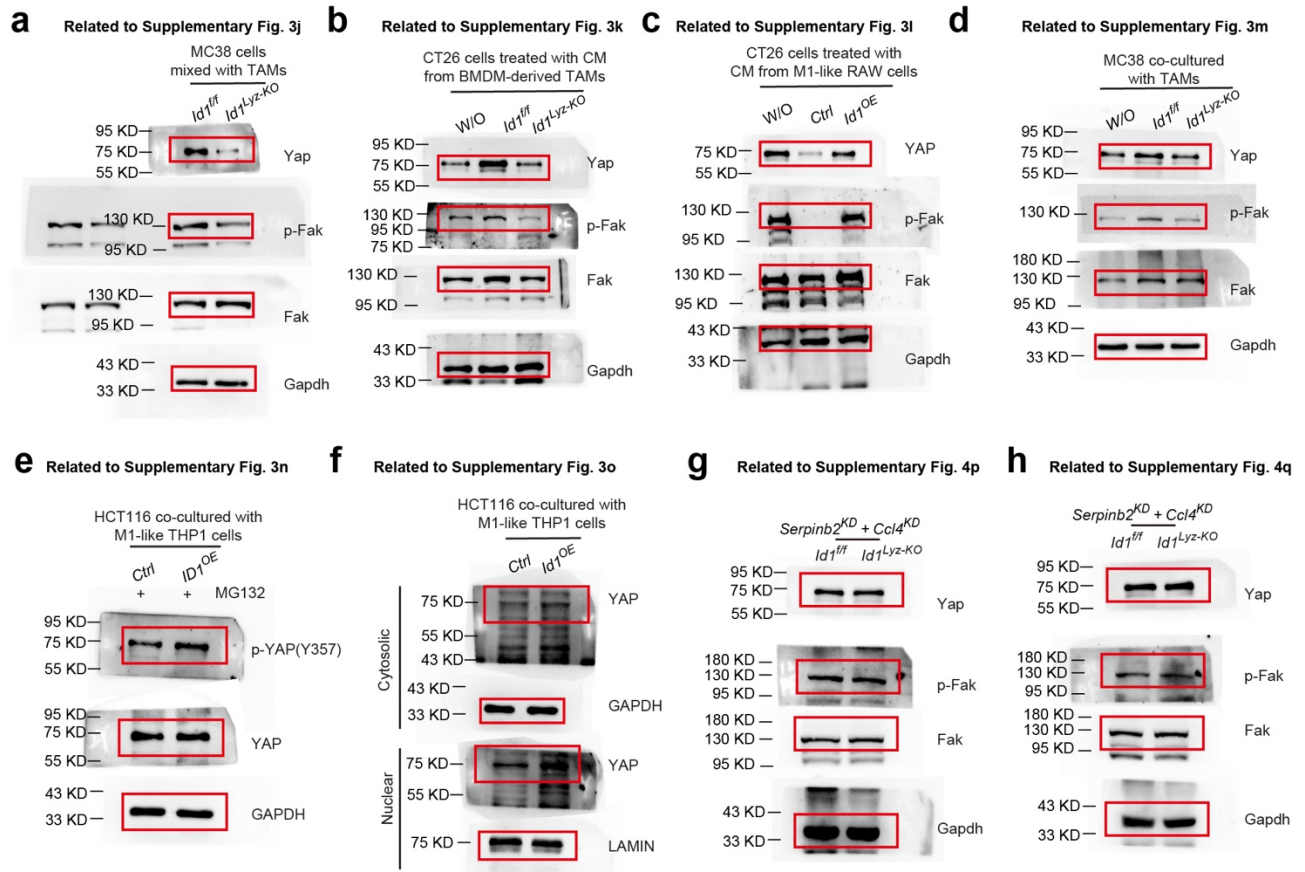

**Supplementary Fig. 10 Uncropped images of Western blot in Supplementary Fig. 3, 4.**

**a-h**, Uncropped images of Western blot in Supplementary Fig. 3j, 3k, 3l, 3m, 3n, 3o, 4p and 4q.

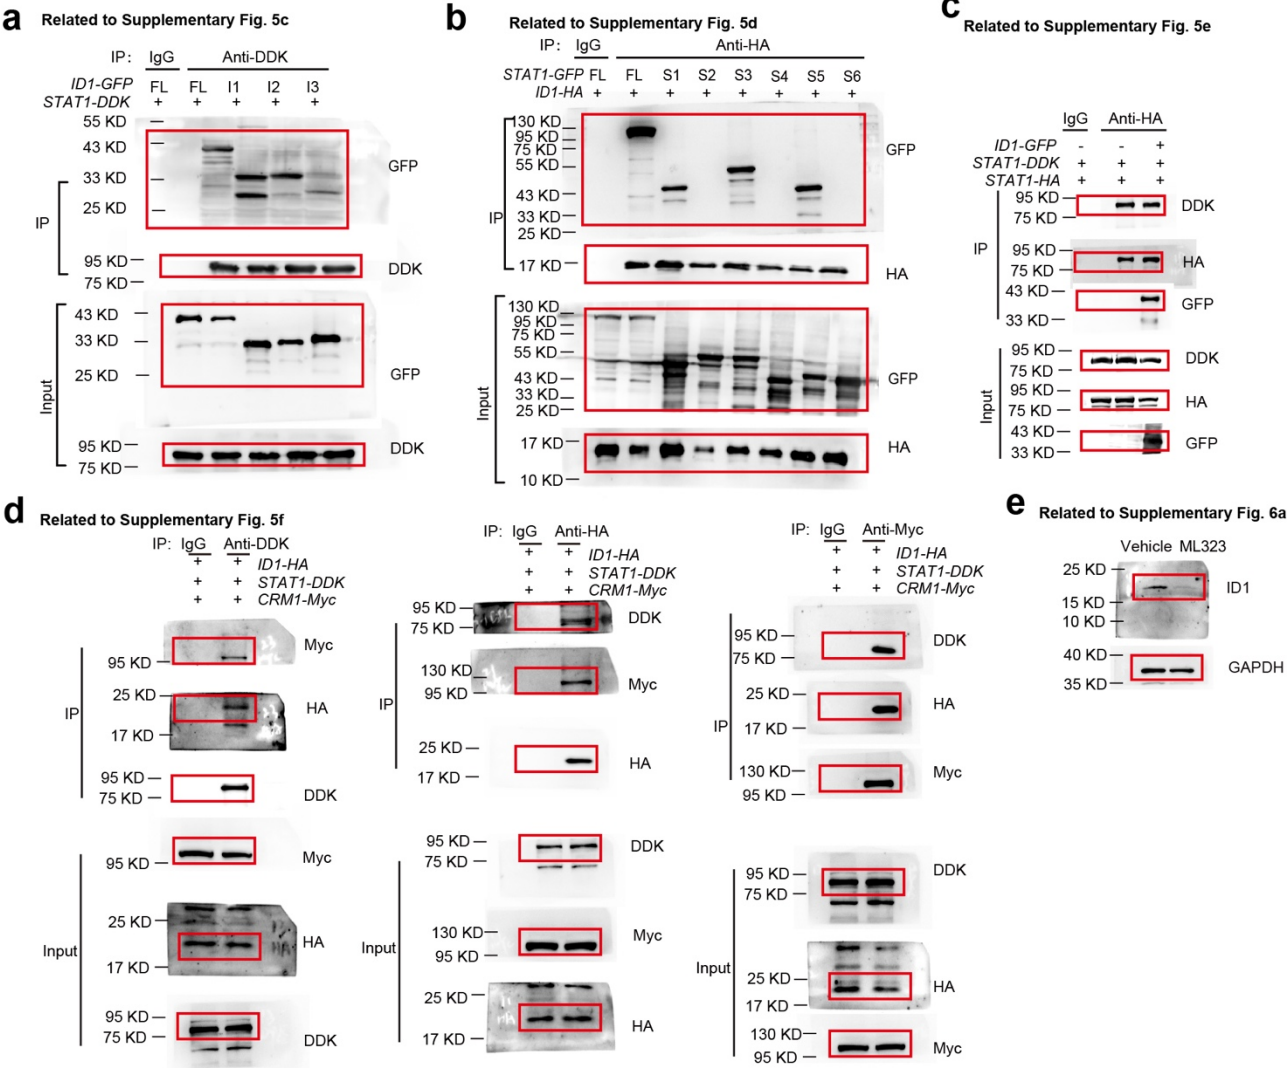

## Supplementary-tables

**Supplementary Table 1 The relationship between ID1 expressing TAMs and clinicopathological features of CRC patients.**

| Clinicopathological<br>features | Cases | ID1 <sup>+</sup> TAM counts |      | $\chi^2$ | $P$    |
|---------------------------------|-------|-----------------------------|------|----------|--------|
|                                 |       | Low                         | High |          |        |
| Age (years)                     |       |                             |      |          |        |
| < 68                            | 49    | 25                          | 24   | 0.087    | 0.6750 |
| ≥ 68                            | 52    | 25                          | 27   |          |        |
| Sex                             |       |                             |      |          |        |
| female                          | 51    | 24                          | 27   | 0.4866   | 0.4854 |
| male                            | 50    | 27                          | 23   |          |        |
| Lymph node metastasis           |       |                             |      |          |        |
| 0                               | 61    | 36                          | 25   | 4.474    | 0.0344 |
| ≥ 1                             | 40    | 15                          | 25   |          |        |
| Pathological grade              |       |                             |      |          |        |
| I-II                            | 84    | 45                          | 39   | 5.109    | 0.0238 |
| III-IV                          | 17    | 4                           | 13   |          |        |
| TNM stage                       |       |                             |      |          |        |
| 1-2                             | 61    | 37                          | 24   | 5.186    | 0.0228 |
| 3-4                             | 40    | 15                          | 25   |          |        |

Chi-square test was used in the statistics.



**Supplementary Table 2 Clinical information of the CRC patients.**

| Patients<br>Number | Sample<br>specimen | Age   | Sex |
|--------------------|--------------------|-------|-----|
| 1                  | Tumor              | 50~60 | M   |
| 2                  | Tumor              | 50~60 | M   |
| 3                  | Tumor              | 50~60 | M   |
| 4                  | Tumor              | 60~70 | F   |
| 5                  | Tumor              | 60~70 | F   |
| 6                  | PBMC               | 40~50 | M   |
| 7                  | PBMC               | 60~70 | F   |
| 8                  | PBMC               | 40~50 | F   |
| 9                  | PBMC               | 50~60 | M   |
